# Supplementary material for: Using CRISPR-Cas9-mediated genome editing to generate C. difficile mutants defective in selenoproteins synthesis
Source: PubMed Central journal article supplement (PMC5677094; doi:10.1038/s41598-017-15236-5), 2017-11-07
Supplement: 41598_2017_15236_MOESM1_ESM.pdf [file 41598_2017_15236_MOESM1_ESM.pdf]

1 **Using CRISPR-Cas9-mediated genome editing to generate *C. difficile* mutants defective**  
2 **in selenoproteins synthesis**

3

4 Kathleen N. McAllister<sup>1</sup>, Laurent Bouillaut<sup>2,&</sup>, Jennifer N. Kahn<sup>1</sup>, William T. Self<sup>3</sup> and Joseph A.  
5 Sorg<sup>1\*</sup>

6 <sup>1</sup>Department of Biology, Texas A&M University, College Station, TX

7 <sup>2</sup>Department of Molecular Biology & Microbiology, Tufts University School of Medicine, Boston,  
8 MA

9 <sup>3</sup>Burnett School of Biomedical Sciences, University of Central Florida, Orlando, FL

10 <sup>&</sup>Present address: Matrivax R&D Corp. 650 Albany Street, Boston, MA

11

12

13 Running Title: CRISPR-Cas9 mutagenesis of *C. difficile*

14

15 \*Corresponding Author

16 ph: 979-845-6299

17 email: jsorg@bio.tamu.edu

18

19

20 **Supplemental Information**

21

22 **Figure S1: No DNA contamination in RNA samples of *C. difficile* R20291 vectors.**

23 RT-PCR without reverse transcriptase showing the comparison of *C. difficile* R20291 pMTL8151  
 24 and *C. difficile* R20291 pJK02 induced without aTet and those induced in the presence of aTet  
 25 to turn on the expression of *cas9*. Also tested was the sgRNA and *catP*, as positive controls.  
 26 The full, uncropped gels corresponding to this data can be found below.

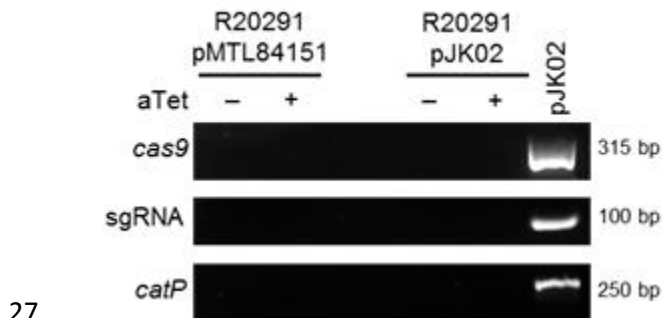

27

28

29

30 Table S1: Strains and plasmids used in this study.

| Strain                      | Description/Phenotype                                                                                                                                                                                 | Source or Reference |
|-----------------------------|-------------------------------------------------------------------------------------------------------------------------------------------------------------------------------------------------------|---------------------|
| <i>E. coli</i> DH5 $\alpha$ | F <sup>-</sup> endA1 glnV44 thi-1 recA1 relA1 gyrA96 deoR nupG $\Phi$ 80d/lacZ $\Delta$ M15 $\Delta$ (lacZYA-argF)U169, hsdR17(r <sub>K</sub> <sup>-</sup> m <sub>K</sub> <sup>+</sup> ), $\lambda$ - | 51                  |
| <i>E. coli</i> HB101 pRK24  | <i>lavYI galK2 xyl-6 mtl-I repsL20</i> carrying pRK24                                                                                                                                                 | B. Dupuy            |
| <i>B. subtilis</i> BS49     | Tn916 donor strain, Tet <sup>R</sup>                                                                                                                                                                  | 52                  |
| <i>C. difficile</i> JIR8094 | <i>erm</i> -sensitive derivative of 630                                                                                                                                                               | 14                  |
| <i>C. difficile</i> LB-CD7  | <i>selD</i> TargeTron mutant                                                                                                                                                                          | This Study          |

|                             |                                                                                                         |            |
|-----------------------------|---------------------------------------------------------------------------------------------------------|------------|
| <i>C. difficile</i> LB-CD12 | <i>grdA</i> TargetTron mutant                                                                           | 19         |
| <i>C. difficile</i> LB-CD4  | <i>prdB</i> TargetTron mutant                                                                           | 19         |
| <i>C. difficile</i> LB-CD8  | <i>prdR</i> TargetTron mutant                                                                           | 19         |
| <i>C. difficile</i> R20291  | Wild type, ribotype 027                                                                                 | 53         |
| <i>C. difficile</i> KNM5    | <i>pyrE</i> targeted CRISPR- <i>cas9</i> mutant, uracil auxotroph                                       | This study |
| <i>C. difficile</i> KNM6    | <i>selD</i> targeted CRISPR- <i>cas9</i> mutant                                                         | This study |
|                             |                                                                                                         |            |
| Plasmids                    |                                                                                                         |            |
| pCE240                      | Derivative of pJIR750ai (Sigma-Aldrich)                                                                 | 45         |
| pBL38                       | <i>selD</i> TargetTron in pCE240                                                                        | This study |
| pBL54                       | pMC123-containing group II intron from pBL38                                                            | This study |
| pJK02                       | <i>traJ</i> in pKM71                                                                                    | This study |
| pJS116                      | <i>B. subtilis</i> - <i>C. difficile</i> shuttle vector (pCD6 ColE1 <i>Tn916 oriT</i> Cm <sup>R</sup> ) | 6          |
| pJS170                      | <i>selD</i> homology region in pJK02                                                                    | This study |
| pJS187                      | <i>selD</i> -targeted sgRNA in pJS170                                                                   | This study |
| pJS194                      | <i>tn916 oriT</i> in pJS187                                                                             | This study |
| pKM22                       | <i>spoVAC</i> - targeted sgRNA in pJS116                                                                | This study |
| pKM46                       | codon-optimized wildtype <i>cas9</i> in pKM22                                                           | This study |
| pKM48                       | codon-optimized <i>cas9</i> <sub>D10A</sub> in pKM22                                                    | This study |
| pKM54                       | <i>gdh</i> promoter with sgRNA in pKM46                                                                 | This study |
| pKM55                       | <i>gdh</i> promoter with sgRNA in pKM48                                                                 | This study |
| pKM64                       | <i>pyrE</i> homology region in pKM54                                                                    | This study |
| pKM65                       | <i>pyrE</i> homology region in pKM55                                                                    | This study |
| pKM71                       | <i>pyrE</i> -targeted sgRNA in pKM64                                                                    | This study |
| pKM72                       | <i>pyrE</i> -targeted sgRNA in pKM65                                                                    | This study |

|                |                                                                                      |                           |
|----------------|--------------------------------------------------------------------------------------|---------------------------|
| pKM93          | <i>traJ</i> in pKM72                                                                 | This study                |
| pKM142         | <i>selD</i> with 500 bp upstream in pJS116                                           | This study                |
| pMC123         | <i>C. difficile</i> shuttle vector                                                   | 54                        |
| pMK-RQ-Bs-cas9 | codon-optimized <i>cas9</i> for <i>C. difficile</i> in pMK-RQ-Bs                     | Invitrogen,<br>This study |
| pMTL84151      | <i>E. coli-C. difficile</i> shuttle vector (pCD6 ColE1 <i>traJ</i> Cm <sup>R</sup> ) | 55                        |
| pRPF215        | tetracycline-inducible P <sub>tet</sub> promoter                                     | R. Fagan <sup>16</sup>    |

31

32 Table S2: Oligonucleotides used in this study.

| Oligonucleotide | Sequence                                                                                                  |
|-----------------|-----------------------------------------------------------------------------------------------------------|
| gRNA_1_for      | AAATACGGTGTTTTTGTACCCTAAGTTTCATAAAAATAAGAAGC<br>CTGCAAATGCAGGCTTCTATTTTTATGGTTTAAACCCGCATTATT<br>AAA      |
| gRNA_2_rev      | CTTTTCTTATATTTTTATTTTTTAATTTTATGTATACAAAAAGTA<br>ACAAAATTGTAATTTTTTTAATAATGCGGGTTTAAACCATAAAAA<br>T       |
| gRNA_3_for      | AATATTAATAAAAATAAAAATATAAGAAAAAGTTTATATCTTTTGGTTA<br>ATTATTACAATAAGTCTCATTTATTGAAATAATATCAAATATATATT<br>A |
| gRNA_4_rev      | ATTTCTAGCTCTAAAACAATAAAGAAAAATCTATTTTTATTATTTT<br>TTCCTTATTTACCAATTATAATATATATTTGATATTATTTCAATAAA<br>T    |
| gRNA_5_for      | GATTTTTCTTTATTGTTTTAGAGCTAGAAATAGCAAGTTAAAATA<br>AGGCTAGTCCGTTATCAACTTGAAAAAGTGGCACCGAGTCGGTG<br>CTTT     |
| gRNA_6_rev      | TAAAAATAGTTGCAGAGCTTTGTACACTAGTCAGACATCATGCTG<br>ATCTAGATTTCTCCATAGAAAAAAGCACCGACTCGGTGCCACTT<br>TTTCA    |
| gRNA_7_rev      | ATTTTGGTCATGAGATTATCAAAAAGGAGTTTAATAAAAAATAAAA<br>ATAAGCTCTGCAACCATCTAAAAATAGTTGCAGAGCTTTGTACAC<br>TAGT   |
| 5'gRNA          | AAATACGGTGTTTTTGTACCCTAAGTTTCATAAAAATAAGAAGC<br>CTGCAAATGCAGGC                                            |
| 3'gRNA          | TTGGTCATGAGATTATCAAAAAGGAGTTTAATAAAAAATAAAAA<br>AGCTCTGCAACCA                                             |
| 5'MTL_tetRprom  | CCATGGAGATCTCGAGGCCTGCAGACATGCGCGATCGCAGACC<br>CACTTTCACATTTAAG                                           |
| 3'tetR_Cas9     | ATCTAAGCCTATTGAGTATTTCTTATCCATTTAATTAAAAAACCT<br>CCTAGTATTATTGAGC                                         |
| 5'tetR_CO_cas9  | CTGAGCTCAATAACTAGGAGGTTTTTTTAATTAATGGATAAAA<br>AATATAGTATAGGATTAGATATAGGAAC                               |

|                     |                                                                                                                                                                      |
|---------------------|----------------------------------------------------------------------------------------------------------------------------------------------------------------------|
| 3'MTL_CO_cas9       | TCACGACGTTGTAAAACGACGGCCAGTGCCAAGCTTTTAATCAC<br>CACCTAATTGAGATAAATCTAT                                                                                               |
| 5'tetR_CO_cas9_D10A | CTGAGCTCAATAATACTAGGAGGTTTTTTAATTAATGGATAAAA<br>AATATAGTATAGGATTAGCTATAGGAACAAATAG                                                                                   |
| 5'gdh               | TGCAGGCTTCTTATTTTTATGGTTTAAACGGTTTTAGCTGGGATAT<br>CG                                                                                                                 |
| 3'gdh_gRNA          | AAAACAATAAAGAAAAAATCTATTTGGTACCTTTACAGTTTAATTA<br>TAGCACACTTTATT                                                                                                     |
| 5'gRNA_gdh          | AGTGTGCTATAATTAAGTGTAAAGGTACCAAATAGATTTTTCTT<br>TATTGTTTTAG                                                                                                          |
| 3'gRNA 2            | CATCTAAAATAGTTGCAGAGCTTACGCGTCTAGTCAGACATCAT<br>GCTGA                                                                                                                |
| 5'pyrE_UP           | TTATCAGGAAACAGCTATGACCGCGGCCGCGACGTGATTTTTAA<br>TGGGTA                                                                                                               |
| 3'pyrE_UP           | TAAGTAACACTATAAATAATTAAGTTTTTAATTATTTTTCCTCCATG<br>TTAATG                                                                                                            |
| 5'pyrE_DOWN         | ATAACATTAACATGGAGGAAAAATAATTA AAAACTTAATTATTTAT<br>AGTGTACTTAAAA                                                                                                     |
| 3'pyrE_DOWN         | GTGGGTCTGCGATCGCGCATGTCTGCAGGCCTCGAGAAGCATT<br>GATGTTCTTCT                                                                                                           |
| pyrE_gRNA_gBlock    | GGTACCGAAAAGTGATGCATTGTTGGGTTTTAGAGCTAGAAATA<br>GCAAGTTAAAATAAGGCTAGTCCGTTATCAACTTGAAAAAGTGGC<br>ACCGAGTCGGTGCTTTTTTTCTATGGAGAAATCTAGATCAGCATG<br>ATGTCTGACTAGACGCGT |
| 5'traJ              | GCGAGGAAGCGGAAGAGCGCCCAATACGCAGGGCCCCCTGCTT<br>CGGGGTCA                                                                                                              |
| 3'traJ              | AATTTATCTACAATTTTTTATCCTGCAGGGGGCCCGATCGGTCT<br>TGCCTTG                                                                                                              |
| 5'MTL_selID_UP      | TTATCAGGAAACAGCTATGACCGCGGCCGCATTAATAAAAGTGA<br>TAAATTTCTTTTCAT                                                                                                      |
| 3'MTL_selID_UP      | TCAAAACAATCACTCTTCTCTATAATTTTTGAGATAAAACTGAT<br>GCCA                                                                                                                 |
| 5'selID_MTL_DN      | CCAGAGGTTCTGGCATCAGTTTTATCTCAAATATTATAGAGAAA<br>GAGTGATTGTTTT                                                                                                        |
| 3'selID_MTL_DN      | CTGCGATCGCGCATGTCTGCAGGCCTCGAGTCTAGTAAGTTGAT<br>TTTTCTTCATT                                                                                                          |
| CRISPR_selID_183    | GGTACCTGCTATGGGAGGCAAACCTTGTTTTAGAGCTAGAAATA<br>GCAAGTTAAAATAAGGCTAGTCCGTTATCAACTTGAAAAAGTGGC<br>ACCGAGTCGGTGCTTTTTTTCTATGGAGAAATCTAGATCAGCATG<br>ATGTCTGACTAGACGCGT |
| 5'Tn916ori          | AAGCGGAAGAGCGCCCAATACGCAGGGCCCTAACATCTTCTATT<br>TTTCCCA                                                                                                              |
| 3'Tn916ori          | TATCTACAATTTTTTATCCTGCAGGGGGCCCTAAAGGGAATGT<br>AGATAAATTATTAG                                                                                                        |
| 5'selID_comp        | CAATTTTTTATCAGGAAACAGCTATGACCGCGGCCGCACCTAAA<br>ATAGGTGAAGCAAC                                                                                                       |
| 3'selID_comp        | GCCAGTGCCAAGCTTGCATGTCTGCAGGCCTCGAGTTATAAAAC<br>TGTAATATTTTTCC                                                                                                       |
| 5' tcdB             | TTACATTTGTTTGGATTGGAGGTC                                                                                                                                             |

|               |                                                                  |
|---------------|------------------------------------------------------------------|
| 3' tcdB       | AGCAGCTAAATTCCACCTTTCTACC                                        |
| 5' catP 3     | ATGGTATTTGAAAAAATTGATAAAAATAG                                    |
| 3' catP 2     | TTAACTATTTATCAATTCCTGCAATTCG                                     |
| 5'pyrE 2      | GTCCAGTGTTCTGGGGAG                                               |
| 3'pyrE 2      | AAAATTTACATTTTTTAAGTAACACTATAAATAATTAAGTTTTTA                    |
| 5'selD        | GAGCTTCCTAAAAATGAAGTAAATATCAATAAACAG                             |
| 3'selD        | TTTTGCTCAAAACAATCACTCTTTCTCTATAATATT                             |
| 5'COcas9_RT   | GTGTAGGATGGGCAGTAATAAC                                           |
| 3'COcas9_RT   | CCAAATATTGGATGTCTTTTCGTG                                         |
| 5'gRNA_RT     | GTTTTAGAGCTAGAAATAGCAAG                                          |
| 3'gRNA_RT     | CTGATCTAGATTTCTCCATAG                                            |
| 5'catP_RT     | CTTTGCAAGTGTACCTTGTACC                                           |
| 3'catP_RT     | GTCAGACTTACACTCAGTCC                                             |
| oLB70         | AAAAGCTTTTGCAACCCACGTCGATCGTGAAGAGCCTAAATATGT<br>GCGCCAGATAGGGTG |
| oLB71         | CAGATTGTACAAATGTGGTGATAACAGATAAGTCAAATATGGTAA<br>CTTACCTTTCTTTGT |
| oLB72         | CGCAAGTTTCTAATTTTCGGTTGGCTCTCGATAGAGGAAAGTGTCT                   |
| EBS-universal | CGAAATTA GAACTTTCGTTTCAGTAAAC                                    |
| oLB76         | ATGACAACAGCAGGTGGTTGAGCCGC                                       |
| oLB77         | ATTTGTGCCATTTCTATTGCACC                                          |

33

34

35

36 **Uncropped Gel images (labeled)**

37

38

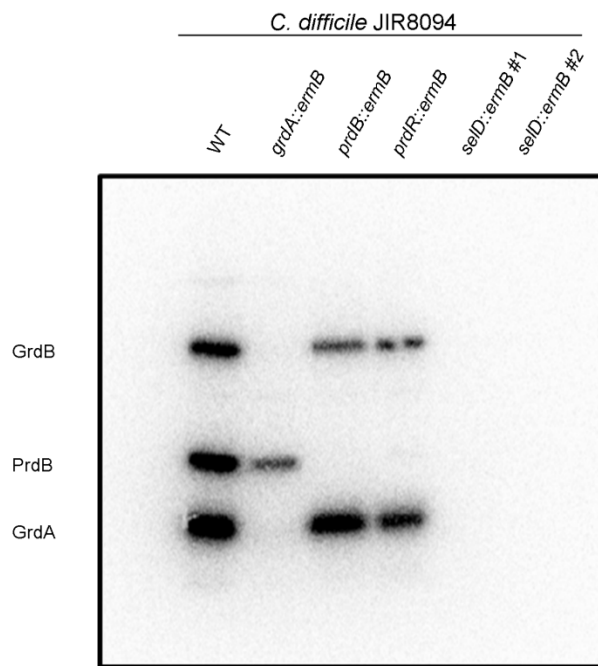

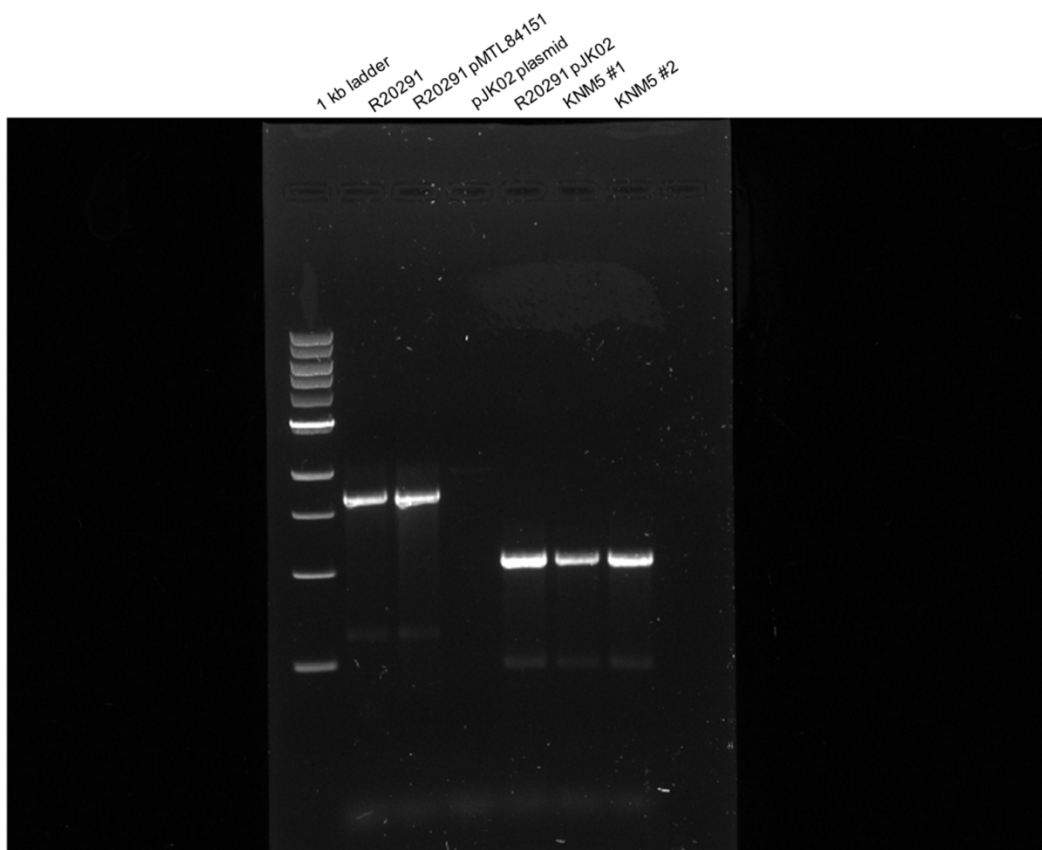

*pyrE* PCR

40 PCR of *pyrE* (Figure 3B). Labels added for clarity but the gel images is unaltered / uncropped

41



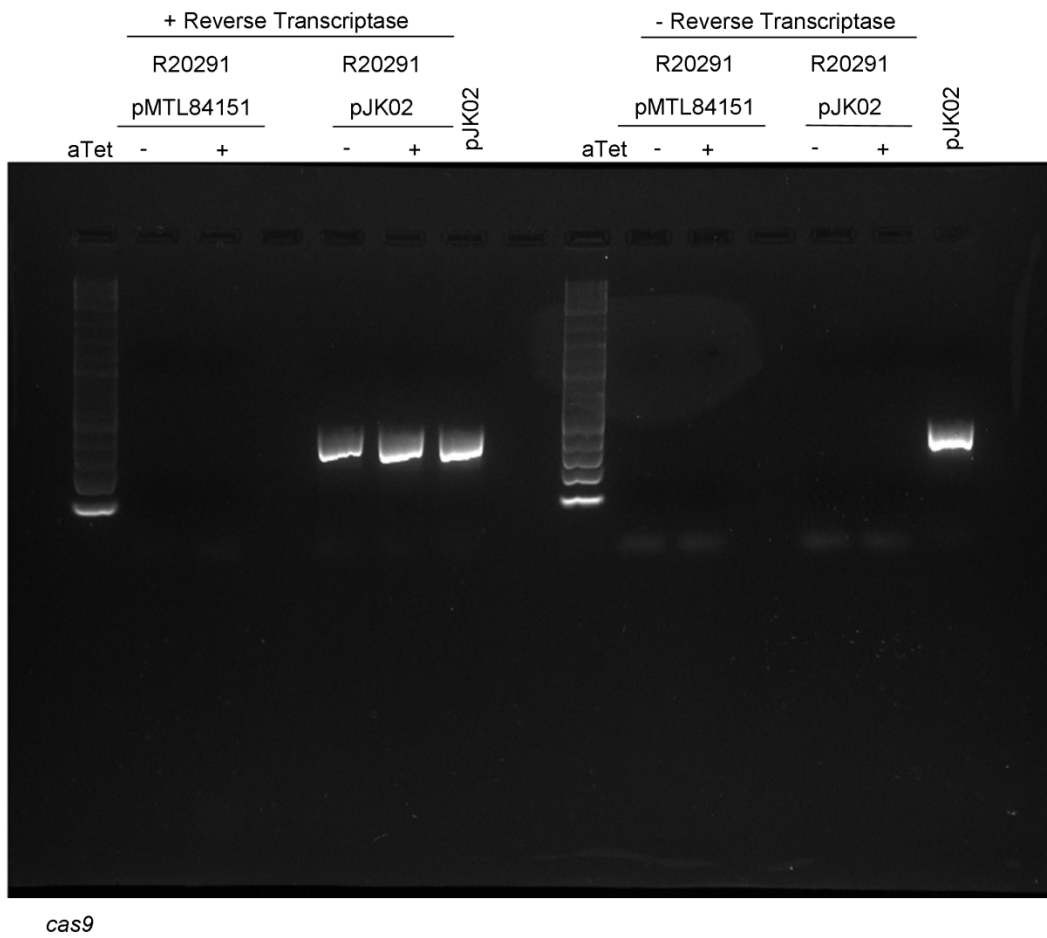

42 **cas9 RT-PCR (Figure 3E).** Labels added for clarity, but the image is unaltered / uncropped.

43

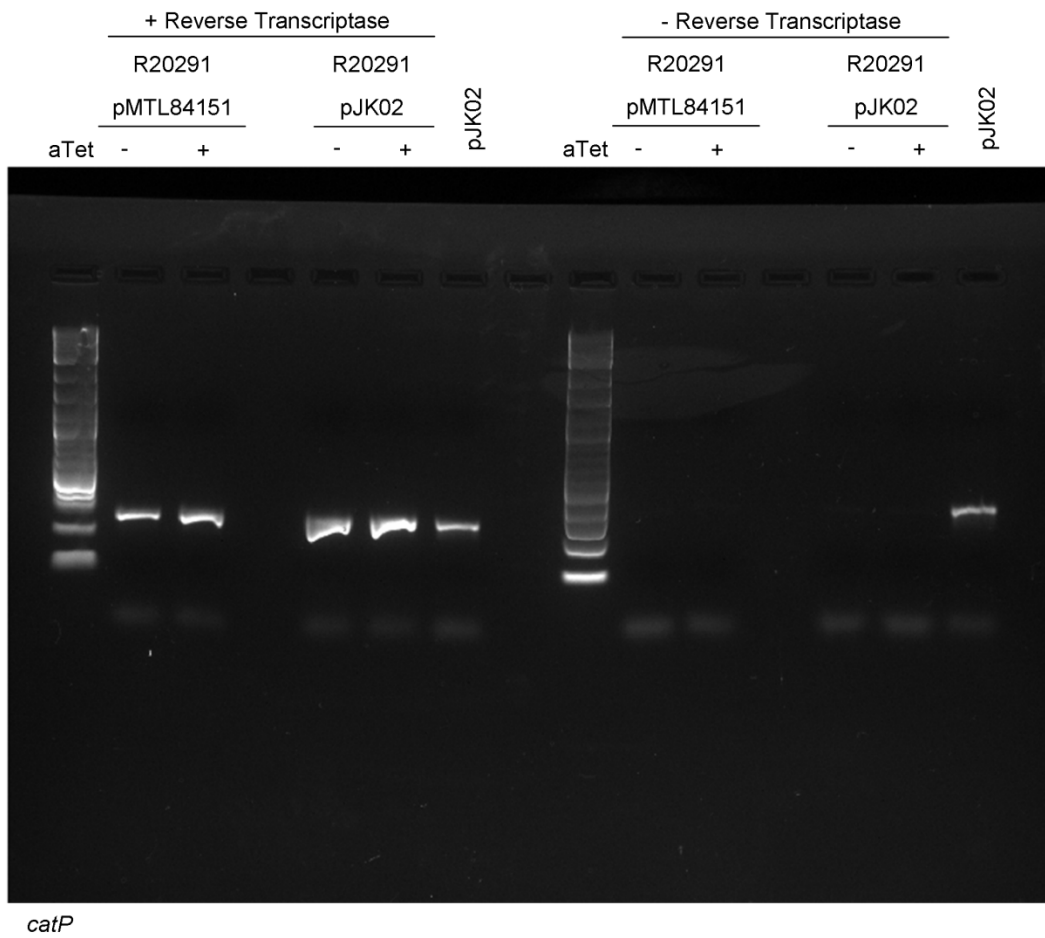

44

45 **cat9** RT-PCR (Figure 3E). Labels added for clarity, but the image is unaltered / uncropped.

Irrelevant data on top

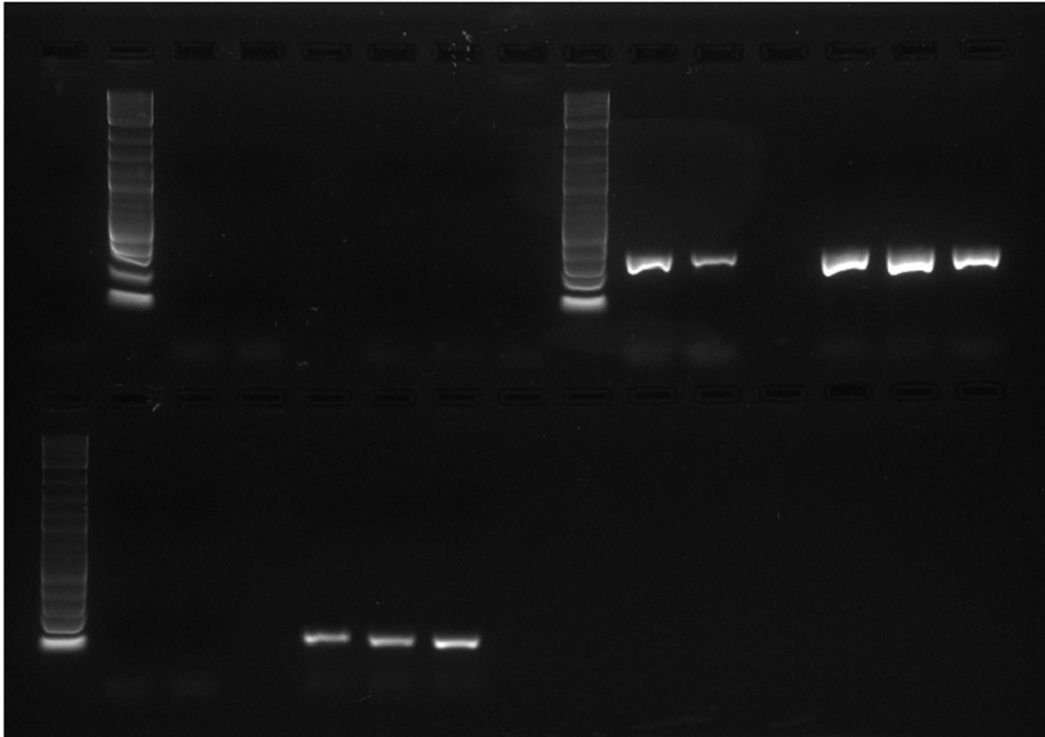

|      |           |   |        |   |       |
|------|-----------|---|--------|---|-------|
| aTet | -         | + | -      | + | pJK02 |
|      | R20291    |   | R20291 |   |       |
|      | pMTL84151 |   | pJK02  |   |       |
|      |           |   |        |   |       |

46 **sgRNA RT-PCR (Figure 3E).** Plus-reverse transcriptase conditions for the sgRNA RT-PCR on  
47 the bottom. Irrelevant data on top. Labels added for clarity, but the image is unaltered /  
48 uncropped.

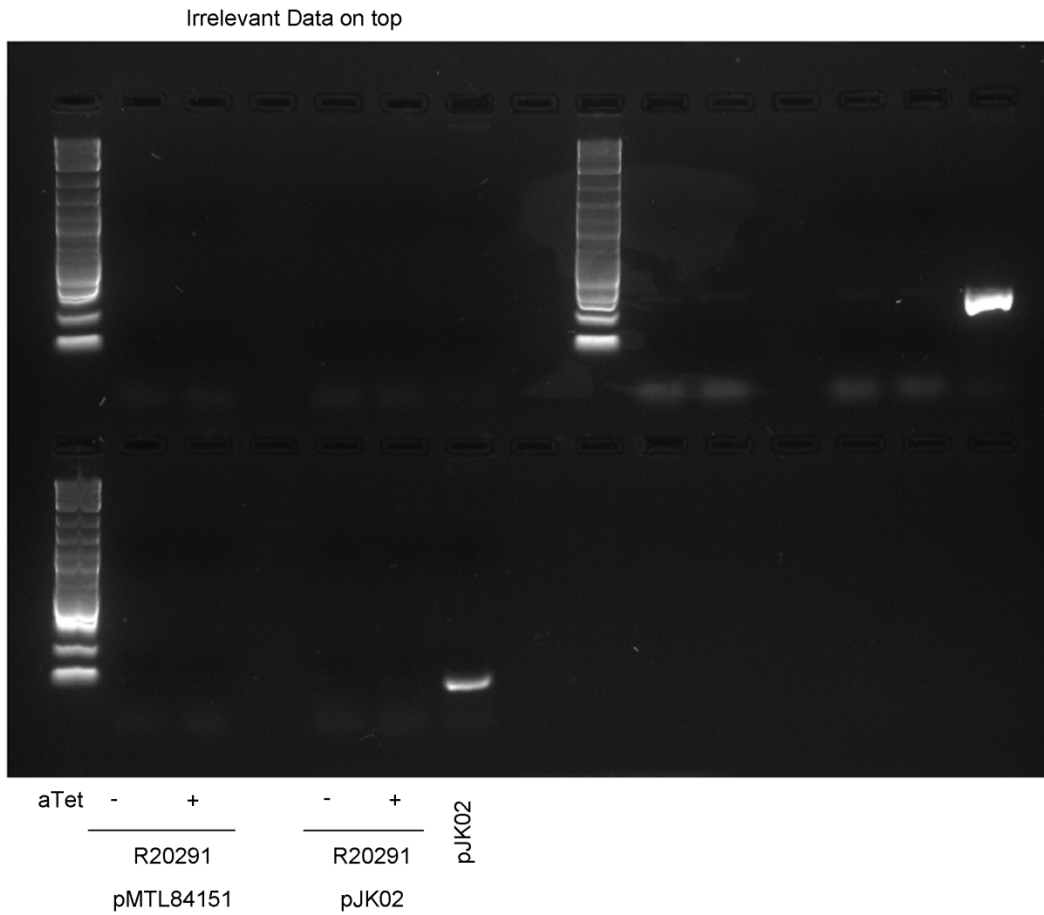

50 **sgRNA RT-PCR (Figure 3E).** No-reverse transcriptase conditions for the sgRNA RT-PCR on  
 51 the bottom. Irrelevant data on top. Labels added for clarity, but the image is unaltered /  
 52 uncropped

53

54

55
